# Supplementary material
Source: publisher figshare collection journal article supplement (https://tandf.figshare.com/articles/dataset/_/25388558)
Supplement: Supplementary file 1 [file 2]

# Comparative study of volatile oil constituents, anti-microbial properties, and antibiofilm activities in *Eucalyptus camaldulensis* and *Eucalyptus globulus*: insights from central Saudi Arabia

Hamdoon A. Mohammed<sup>1,2\*</sup>, Ashok Aspatwar<sup>3</sup>, Abdulaziz F. Aljarbooa<sup>4</sup> and Kamal A. Qureshi<sup>5\*</sup>

## SUPPLEMENTARY DATA

**Table S1. One-way ANOVA for the preliminary antimicrobial activities of *E. camaldulensis* and *E. globulus* volatile oils**

| ANOVA                   |                |                |    |             |          |      |
|-------------------------|----------------|----------------|----|-------------|----------|------|
|                         |                | Sum of Squares | df | Mean Square | F        | Sig. |
| <i>E. camaldulensis</i> | Between Groups | 491.143        | 6  | 81.857      | 1548.649 | .000 |
|                         | Within Groups  | .740           | 14 | .053        |          |      |
|                         | Total          | 491.883        | 20 |             |          |      |
| <i>E. globulus</i>      | Between Groups | 371.143        | 6  | 61.857      | 1202.778 | .000 |
|                         | Within Groups  | .720           | 14 | .051        |          |      |
|                         | Total          | 371.863        | 20 |             |          |      |

**Table S2.** Unpaired independent samples t-test for the preliminary antimicrobial activities of *E. camaldulensis* and *E. globulus* volatile oils.

| Independent Samples Test         |                             |                                         |      |                              |       |                 |                 |                       |                                           |        |
|----------------------------------|-----------------------------|-----------------------------------------|------|------------------------------|-------|-----------------|-----------------|-----------------------|-------------------------------------------|--------|
|                                  |                             | Levene's Test for Equality of Variances |      | t-test for Equality of Means |       |                 |                 |                       |                                           |        |
|                                  |                             | F                                       | Sig. | t                            | df    | Sig. (2-tailed) | Mean Difference | Std. Error Difference | 95% Confidence Interval of the Difference |        |
|                                  |                             |                                         |      |                              |       |                 |                 |                       | Lower                                     | Upper  |
| <i>S. aureus</i> ATCC 29213      | Equal variances assumed     | .308                                    | .609 | .000                         | 4     | 1.000           | .0000           | .2082                 | -.5780                                    | .5780  |
|                                  | Equal variances not assumed |                                         |      | .000                         | 3.485 | 1.000           | .0000           | .2082                 | -.6133                                    | .6133  |
| MRSA                             | Equal variances assumed     | .308                                    | .609 | -4.804                       | 4     | .009            | -1.0000         | .2082                 | -1.5780                                   | -.4220 |
|                                  | Equal variances not assumed |                                         |      | -4.804                       | 3.485 | .012            | -1.0000         | .2082                 | -1.6133                                   | -.3867 |
| <i>E. coli</i> ATCC 25922        | Equal variances assumed     | .800                                    | .422 | .000                         | 4     | 1.000           | .0000           | .1291                 | -.3584                                    | .3584  |
|                                  | Equal variances not assumed |                                         |      | .000                         | 2.941 | 1.000           | .0000           | .1291                 | -.4155                                    | .4155  |
| <i>K. pneumoniae</i> ATCC 27736  | Equal variances assumed     | .400                                    | .561 | .000                         | 4     | 1.000           | .0000           | .2000                 | -.5553                                    | .5553  |
|                                  | Equal variances not assumed |                                         |      | .000                         | 3.200 | 1.000           | .0000           | .2000                 | -.6146                                    | .6146  |
| <i>S. typhimurium</i> ATCC 13311 | Equal variances assumed     | .308                                    | .609 | 24.019                       | 4     | .000            | 5.0000          | .2082                 | 4.4220                                    | 5.5780 |
|                                  | Equal variances not assumed |                                         |      | 24.019                       | 3.485 | .000            | 5.0000          | .2082                 | 4.3867                                    | 5.6133 |
| <i>C. albicans</i> ATCC 10231    | Equal variances assumed     | .308                                    | .609 | 9.608                        | 4     | .001            | 2.0000          | .2082                 | 1.4220                                    | 2.5780 |
|                                  | Equal variances not assumed |                                         |      | 9.608                        | 3.485 | .001            | 2.0000          | .2082                 | 1.3867                                    | 2.6133 |
| <i>A. niger</i> ATCC 6275        | Equal variances assumed     | 4.000                                   | .116 | 17.321                       | 4     | .000            | 2.0000          | .1155                 | 1.6794                                    | 2.3206 |
|                                  | Equal variances not assumed |                                         |      | 17.321                       | 2.000 | .003            | 2.0000          | .1155                 | 1.5032                                    | 2.4968 |
